# Supplementary material
Source: PubMed Central journal article supplement (PMC5531404)
Supplement: jci-127-92069-s001.pdf [file jci-127-92069-s001.pdf]

Supplemental data

**Biallelic mutations in the ubiquitin ligase *RFWD3* cause Fanconi anemia**

Kerstin Knies, Shojiro Inano, María J. Ramírez, Masamichi Ishiai, Jordi Surrallés, Minoru Takata, and Detlev Schindler

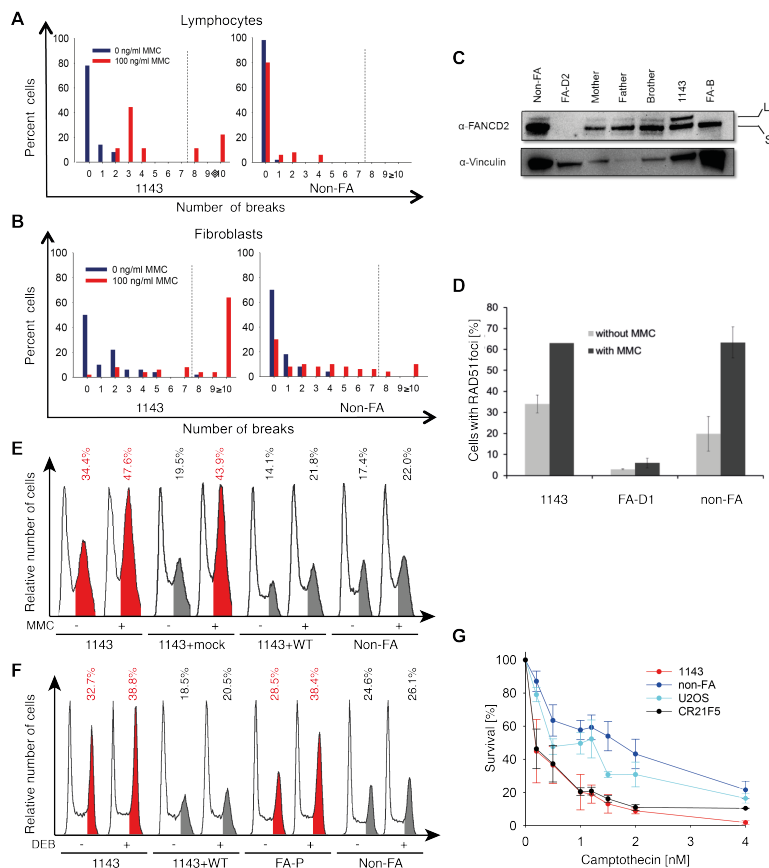

**Supplemental Figure 1. Extended FA phenotype of 1143 cells (related to Figures 1 and 2).**

**(A)** Histograms reflecting proportions of cells with the indicated number of chromosomal breaks per metaphase from lymphocyte cultures, blue without, red after exposure to MMC. Dashed lines delimit high rates ( $>7$ ). 50 metaphases each were scored.

**(B)** Histograms reflecting proportions of cells with the indicated number of chromosomal breaks per metaphase from fibroblast cultures, blue without, red after exposure to MMC. Dashed lines delimit high rates ( $>7$ ). 50 metaphases each were scored. The 1143 plot is reused in Figure 1C.

**(C)** Immunoblot analysis of FANCD2 monoubiquitination of *RFWD3*-mutated (1143), 1143's family members, *FANCD2*-mutated, *FANCB*-mutated and normal control lymphoblasts. Cells were exposed to 40 ng/ml MMC for 16 h.

**(D)** Proportion of RAD51 foci-positive nuclei in 1143, FA-D1 and non-FA fibroblasts, detected by anti-RAD51 staining without (gray) and with (black) prior exposure of cells to MMC (40 ng/ml, 16 h). Data represent mean  $\pm$  SD.  $N=3$ .

**(E)** Cell-cycle analysis without or with exposure to MMC of 1143, 1143+mock, 1143+WT-*RFWD3* and non-FA fibroblasts. Increased G2 compartment size of 1143 and 1143+mock cells (normal  $<28\%$ ) is highlighted in red, normal size is shown in gray.

**(F)** Cell-cycle analysis without or with exposure to MMC of 1143, 1143+WT-*RFWD3*, FA-P and non-FA fibroblasts. Increased G2 compartment size of 1143 and FA-P cells (normal  $<28\%$ ) is highlighted in red, normal size is shown in gray.

**(G)** Dose-response curves of CRISPR clone CR21F5 with targeted *RFWD3* compared to parental U2OS, 1143 and non-FA cells, exposed to camptothecin at the indicated concentrations. Data represent mean  $\pm$  SEM;  $N=5$ . The 1143 and non-FA curves are reused in Figure 1F.

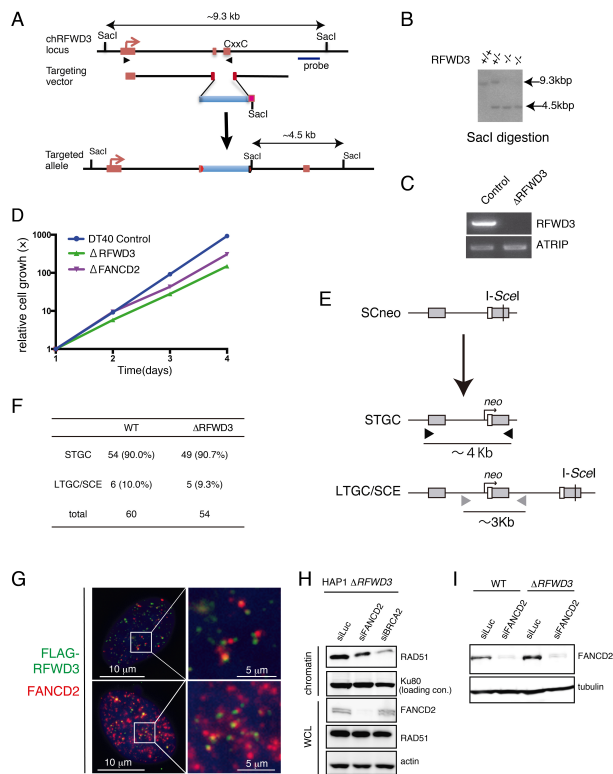

## Supplemental Figure 2. Generation and characterization of *RFWD3*- deficient cellular models (related to Figures 3 and 4).

(A) Partial map of the chicken *RFWD3* locus, the gene disruption vector and the configuration of the targeted allele. An inserted neo-cassette is shown in light blue, a probe for allele discrimination in dark blue. Red boxes indicate the positions of exon 1 with the translation start site, and of exons 2 and 3 that become disrupted. *SacI* sites and bidirectional arrows between them denote restriction fragment positions and lengths used in Supplemental Figure 2B. Arrowheads indicate the positions of primers used in Supplemental Figure 2C.

(B) Genotype determination by Southern blot analysis of WT (+/+), heterozygous (+/-) and homozygous (-/-)  $\Delta$ *RFWD3*-DT40 cells. *SacI*-digested genomic DNA was hybridized with the probe shown in Supplemental Figure 2A.

(C) RT-PCR analysis of chicken *RFWD3* mRNA expression in control and  $\Delta$ *RFWD3*-DT40 cells using the primers shown in Supplemental Figure 2A.

(D) Relative cell growth of WT-DT40,  $\Delta$ *RFWD3*-DT40 and  $\Delta$ *FANCD2*-DT40 cells over a period of four days.

(E) Structure of the SCneo construct and expected HR repair products revealing STGC (short-tract gene conversion) or LTGC/SCE (long-tract gene conversion/unequal sister chromatid exchange).

(F) Number of G418-resistant clones with STGC or LTGC/SCE events in WT-DT40 and  $\Delta$ *RFWD3*-DT40 cells after transfection of I-SceI vector and selection by G418.

(G) A majority of MMC-induced FLAG-*RFWD3* and *FANCD2* foci in U2OS cells co-localized or were in close proximity.

(H) *RFWD3*-mutant HAP1 cells were transduced with the indicated siRNAs and analyzed by immunoblotting 24 h later. Silencing of *FANCD2* resulted in the loss of corresponding protein, knock-down of *BRCA2* in the reduction of *RAD51* on chromatin.

(I) WT and *RFWD3*-mutant HAP1 cells were transduced with *FANCD2* siRNA as above. Silencing resulted in similar loss of *FANCD2* protein in cells of either genotype.

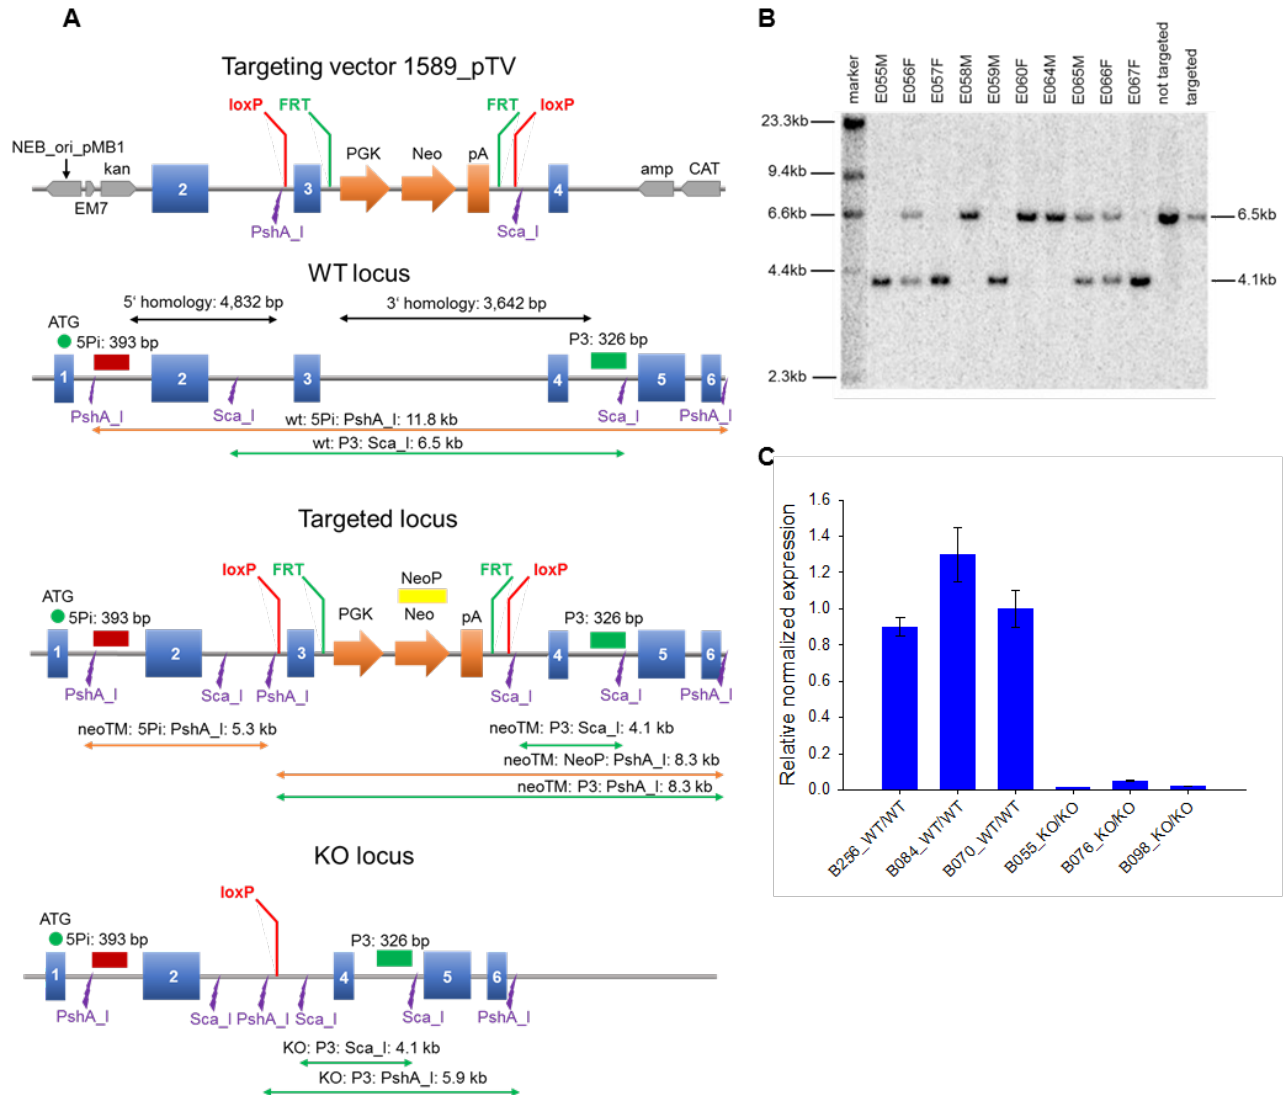

**Supplemental Figure 3. Generation and characterization of *Rfwd3*<sup>-/-</sup> mice (related to Figure 5).**

**(A)** Targeting strategy. The replacement vector contains a neo-cassette (orange) flanked by FRT sites (green) which, together with exon 3, are flanked by loxP sites (red). Using 5' and 3' homology arms the vector was used to target the *Rfwd3* locus of mouse ES. After selection with G418, exon 3 and the neo-cassette were removed by Cre-mediated recombination. The FRT sites for conditional KO were not used. Blue boxes denote exons. P3 (green) 5Pi (red) and NeoP (yellow) represent Southern hybridization probes of specified sizes. PshAI and ScaI designate restriction sites (purple bolts). Bidirectional orange and green arrows display restriction fragments of indicated sizes detected by corresponding probes.

**(B)** Southern blot analysis of *Rfwd3*<sup>-/-</sup>, *Rfwd3*<sup>+/-</sup> and *Rfwd3*<sup>+/+</sup> mice. ScaI-digested genomic DNA was hybridized with the probe P3. Expected sizes: WT 6.5 kb and KO 4.1 kb. E055, 057, 059 and 067 are *Rfwd3*<sup>-/-</sup>; E056, 065 and 066 are *Rfwd3*<sup>+/-</sup>; E058, 060 and 064 are *Rfwd3*<sup>+/+</sup>.

**(C)** Partial map displaying qPCR primers and probe binding site on *Rfwd3* cDNA for exon 3-5 RT assay (upper panel) to confirm loss of exon 3. Normalized relative *Rfwd3* mRNA expression in samples from *Rfwd3*<sup>-/-</sup> and *Rfwd3*<sup>+/+</sup> mice. Data represent mean ± SD. N=3 (lower panel).

**(D)** Partial map displaying qPCR primers and probe binding site on *Rfwd3* cDNA for exon 6-8 RT assay (upper panel) to show reduced transcript. Normalized relative *Rfwd3* mRNA expression in samples from *Rfwd3*<sup>-/-</sup> and *Rfwd3*<sup>+/+</sup> mice. Data represent mean ± SD. N=3 (lower panel).

Supplemental Table 1. Statistical analysis of WES data (related to Results and Figure 1)

|                                                                                                        |                                             |
|--------------------------------------------------------------------------------------------------------|---------------------------------------------|
| Number of total reads                                                                                  | 113,599,566                                 |
| Reads that passed QC                                                                                   | 112,700,612                                 |
| Reads on target                                                                                        | 109,529,301 (97%)                           |
| Exome coverage                                                                                         | 197x                                        |
| Total number of detected variants                                                                      | 29,180                                      |
| Reported SNPs (dbSNP Build 134)                                                                        | 24,675                                      |
| Unknown variants in exons                                                                              | 3,962                                       |
| Unknown variants at splice sites                                                                       | 666 (136 thereof at essential splice sites) |
| Total number of unknown variants in heterozygous condition                                             | 3,981 (including essential splice sites)    |
| Insertions/deletions                                                                                   | 577                                         |
| Missense                                                                                               | 2,211                                       |
| Nonsense                                                                                               | 100                                         |
| Silent                                                                                                 | 982                                         |
| Genes with $\geq 2$ heterozygous unknown variants                                                      | 385                                         |
| Genes with $\geq 2$ heterozygous variants, both predicted to be disease-causing                        | 35                                          |
| Genes involved in DNA repair with $\geq 2$ heterozygous variants, both predicted to be disease-causing | 3                                           |

Supplemental Table 2. Genes with  $\geq 2$  heterozygous sequence variants, both predicted to be disease-causing (related to Results and Figure 1)

|                       |               |
|-----------------------|---------------|
| LOC729737             | KIAA1211      |
| C1orf159              | HGC6.3        |
| SRRM1                 | CCDC146       |
| <b>HORMAD1</b>        | ZNF696        |
| C2orf71/RP54          | ANKRD18B      |
| PLEKHH2               | ANKRD20A2     |
| LOC400986/ANKRD36C    | ANKRD20A1     |
| LOC100287144/USP17L10 | ANKRD2        |
| C10orf76              | ZNF408/RP72   |
| LOC100507338/PFM8     | USP15         |
| FLYWCH1               | <b>RFWD3</b>  |
| ROGDI                 | KIAA0664/CLUH |
| LOC400499             | CBX4          |
| ARMC5                 | AATK          |
| ZNF527                | PRR12         |
| ZNF784                | <b>MCM3AP</b> |
| ZNF335/MCPH10         | MN1           |
| ESX1                  |               |

Genes involved in DNA repair are marked bold. RFWD3 is highlighted in red.

Supplemental Table 3. Cell lines and animals used in this study (related to Methods)

| Cell line or animal                                                                                    | Source or Reference                  |
|--------------------------------------------------------------------------------------------------------|--------------------------------------|
| 1143, 1143 + WT-RFWD3                                                                                  | This study                           |
| 1143 + mock, 1143 + RFWD3-I639K                                                                        | This study                           |
| FA-B, -D1, -P, -Q and non-FA control fibroblast lines                                                  | This study                           |
| U-2 OS (U2OS) parental                                                                                 | Sigma-Aldrich, 92022711              |
| U2OS CR21F5                                                                                            | This study                           |
| HAP1 parental                                                                                          | Horizon Discovery, C859              |
| HAP1 RFWD3 knockout                                                                                    | Horizon Discovery, HZGHC002532c010   |
| HAP1 RFWD3 knockout + RFWD3 WT                                                                         | This study                           |
| DT40 parental                                                                                          | Riken BRC, RCB1464                   |
| DT40 $\Delta$ FANCD2                                                                                   | Mol Cell Biol, 21: 2858-2866 (2001)  |
| DT40 $\Delta$ XRCC3                                                                                    | Mol Cell Biol, 25: 34-43 (2005)      |
| DT40 $\Delta$ RFWD3                                                                                    | This study                           |
| DT40 $\Delta$ RFWD3 + RFWD3 WT                                                                         | This study                           |
| DT40 $\Delta$ RFWD3 + RFWD3 I615K                                                                      | This study                           |
| DT40 $\Delta$ RFWD3 + RFWD3 C267A                                                                      | This study                           |
| DT40 Scneo                                                                                             | J Biol Chem, 276: 44413-44418 (2001) |
| DT40 Scneo $\Delta$ RFWD3 + RFWD3 WT                                                                   | This study                           |
| DT40 Scneo $\Delta$ RFWD3 + RFWD3 I615K                                                                | This study                           |
| DT40 Scneo $\Delta$ RFWD3 + RFWD3 C267A                                                                | This study                           |
| <i>Rfwd3</i> <sup>-/-</sup> , <i>Rfwd3</i> <sup>+/-</sup> and <i>Rfwd3</i> <sup>+/+</sup> C57BL/6 mice | Ozgene                               |

Supplemental Table 4. Human genomic primer sequences (related to Methods)

| Name           | Sequence                             | Used for                  |
|----------------|--------------------------------------|---------------------------|
| RFWD3_Ex_2_F   | AAGTCCATTACCAAACACTTCTGACTTAAGTA     | c.204_205dupCC validation |
| RFWD3_Ex_2_R   | CATAATTTCTAGTACAGCAATGATCACAGACT     | c.204_205dupCC validation |
| RFWD3_Ex_3_F   | AGCATTTAATGGCCTGGAGATGGGTTGA         | Sanger sequencing         |
| RFWD3_Ex_3_R   | TCTACATAATTATGGCCAGTGAAGGCTCTATA     | Sanger sequencing         |
| RFWD3_Ex_4_F   | CTGCTAGCTTCTCATACCTGACATATCTTAT      | Sanger sequencing         |
| RFWD3_Ex_4_R   | ATATTCAGGTTGGGCATGGTGGCTC            | Sanger sequencing         |
| RFWD3_Ex_5-6_F | TACAAGTGTTCTGTAGCCCTTTTGATTGTA       | Sanger sequencing         |
| RFWD3_Ex_5-6_R | AATTATAAATAACAGTGTAAAGACAGACTGCCAATG | Sanger sequencing         |
| RFWD3_Ex_7_F   | TACAGCAAAGAACGTGCATCATAGCATGAA       | Sanger sequencing         |
| RFWD3_Ex_7_R   | TATAGTAGACCTCATCATAAAGTGTGTA         | Sanger sequencing         |
| RFWD3_Ex_8_F   | CAGTTCTCTAGGATTCATGTAAACACTTTCATA    | Sanger sequencing         |
| RFWD3_Ex_8_R   | ATCTTTGCAGCACCCCTGGGGTACTT           | Sanger sequencing         |
| RFWD3_Ex_9_F   | TGACCAGCTGGTTCCCAAGGACTTATA          | Sanger sequencing         |
| RFWD3_Ex_9_R   | AACAAAAAACAGAGCTAAGGTCATCATAAC       | Sanger sequencing         |
| RFWD3_Ex_10_F  | AGTGTGTTCTCAGTAAGGATTAATGATCA        | Sanger sequencing         |
| RFWD3_Ex_10_R  | AACCTGGCTATACTTGTACCAGAACTCTC        | Sanger sequencing         |
| RFWD3_Ex_11_F  | TCTGGAGCCGTCAGATTTTGGGA              | c.1916 T>A validation     |
| RFWD3_Ex_11_R  | ACCTCGTTAGCCTGTGAGCGGTA              | c.1916 T>A validation     |
| RFWD3_Ex_12_F  | TGCATTTATGGCTTTTCCATCCAAGTGGTT       | Sanger sequencing         |
| RFWD3_Ex_12_R  | GACTCATGGAAACCAAGCAATCTCACATA        | Sanger sequencing         |
| RFWD3_Ex_13_F  | GTCAGGTGTGCTGACTTTGAACAACCTT         | Sanger sequencing         |
| RFWD3_Ex_13_R  | TCCTAGAATCATACTAATGCAAACAAACCATGAT   | Sanger sequencing         |
| RFWD3_Ex_c2_F  | GGCCGAGGTAACCTACCGAGTCTT             | cDNA Sanger sequencing    |
| RFWD3_Ex_c2_R  | AAGTCAGGCTGGGTCCTGCTCA               | cDNA Sanger sequencing    |
| RFWD3_Ex_c11_F | GGCTAACTACATCTATGCTGGACTGG           | cDNA Sanger sequencing    |
| RFWD3_Ex_c11_R | TTTTGGTCAATAGTTTGCAAGTAGGTCCT        | cDNA Sanger sequencing    |



Supplemental Table 5. Primer sequences used for RFWD3 cloning and analysis (related to Methods)

| Name                          | Sequence                                                    | Used for                  |
|-------------------------------|-------------------------------------------------------------|---------------------------|
| Human_Puro_for                | CGAGTTGAGCGGTTCCCGGCTGG                                     | Transduction verification |
| Human_Puro_rev                | GTTGATTGTTCCAGACGCGTCTAGGCACC                               | Transduction verification |
| Human_I639K_for               | GCTGCCCTTGGAGCCAGGGGGCTGCAAAGACTTTCAG<br>ACAGAGAACAGCTCCCGG | Mutagenesis               |
| Human_I639K_rev               | CCGGGAGCTGTTCTGTCTGAAAGTCTTGCAGCCCC<br>CTGGCTCCAAGGGCAGC    | Mutagenesis               |
| Human_pLVX-EF1a-IRES-puro_for | gagactagttctagaATGGCTCATGAAGCAATGGAATATGATG                 | Infusion cloning          |
| Human_pLVX-EF1a-IRES-puro_rev | agaggggcgggatccTCACTCCCCTTATAGATGTGGACC                     | Infusion cloning          |
| Human_pIRES_neo_for           | ggcctgtaaccggtATGGCTCATGAAGCAATGGAATATGATG                  | Infusion cloning          |
| Human_pIRES_neo_rev           | ggatccgaattcgaaTCACTCCCCTTATAGATGTGGACC                     | Infusion cloning          |
| DT40chicken_STGC_1            | AACAGCTCTGGTAAGCTTGTCCAGATCGATG                             | Detection of STGC         |
| DT40chicken_STGC_2            | TGCTTTGCGTTCAAGCTTGGCTGCAGGTCG                              | Detection of STGC         |
| DT40chicken_LTGC_1            | GTGAGGAAGAGTTCTTGCAGCT                                      | Detection of LTGC         |
| DT40chicken_LTGC_2            | CAGCGCCCGACCGAAAGGAGCGCACGACC                               | Detection of LTGC         |

Supplemental Table 6. Antibodies used in this study (related to Methods)

| <b>Name</b>     | <b>Type of antibody</b> | <b>Company</b>           | <b>Catalogue number</b> | <b>Used for</b>                         | <b>Dilution</b>  |
|-----------------|-------------------------|--------------------------|-------------------------|-----------------------------------------|------------------|
| Anti-FANCD2     | Mouse monoclonal        | Santa Cruz Biotechnology | sc-20022                | Western blotting                        | 1:500            |
| Anti-FANCD2     | Rabbit polyclonal       | Novus                    | NB100-182               | Western blotting<br>Immunocytochemistry | 1:5000<br>1:500  |
| Anti-RAD51      | Rabbit, polyclonal      | abcam                    | ab63801                 | Immunofluorescence                      | 1:800            |
| Anti-RFWD3      | Rabbit, polyclonal      | abcam                    | ab138030                | Western blotting                        | 1:1000           |
| Anti-Tubulin    | Mouse, monoclonal       | abcam                    | ab44928                 | Western blotting                        | 1:1000           |
| Anti-Tubulin    | Mouse monoclonal        | Sigma-Aldrich            | T5168                   | Western blotting                        | 1:5000           |
| Anti-GAPDH      | Rabbit polyclonal       | abcam                    | ab985-200               | Western blotting                        | 1:1000           |
| Anti-p84        | Mouse, monoclonal       | abcam                    | ab487                   | Western blotting                        | 1:2000           |
| Anti-Histone H3 | Rabbit, polyclonal      | abcam                    | ab1791                  | Western blotting                        | 1:600            |
| Anti-Histone H3 | Mouse monoclonal        | Active Motif             | 39763                   | Western blotting                        | 1:2000           |
| Anti-RAD50      | Mouse, monoclonal       | GeneTex                  | GTX70228                | Western blotting                        | 1:5000           |
| Anti-Vinculin   | Rabbit, monoclonal      | abcam                    | ab129002                | Western blotting                        | 1:10000          |
| Anti-RPA1       | Rabbit, polyclonal      | Bethyl Laboratories      | A300-241A               | Immunofluorescence                      | 1:1000           |
| Anti-RPA2       | Rabbit, polyclonal      | Bethyl Laboratories      | A300-244A               | Western blotting<br>Immunofluorescence  | 1:5000<br>1:1000 |
| Anti-RPA2       | Mouse monoclonal        | abcam                    | ab2175                  | Immunocytochemistry                     | 1:500            |

|                          |                      |                   |        |                                            |                 |
|--------------------------|----------------------|-------------------|--------|--------------------------------------------|-----------------|
| Anti-GFP                 | Mouse<br>monoclonal  | MBL               | M048-3 | Western blotting<br>Immunofluorescence     | 1:5000<br>1:500 |
| Anti-FLAG                | Mouse<br>monoclonal  | Sigma-Aldrich     | F1804  | Western blotting                           | 1:2000          |
| Anti-FLAG                | Rabbit<br>polyclonal | MBL               | PM020  | Immunocytochemistry                        | 1:500           |
| Anti-Rabbit IgG<br>(H+L) | Goat<br>polyclonal   | Life Technologies | A11072 | Immunofluorescence<br>(Secondary antibody) | 1:2000          |

Supplemental Table 7: Primer and probe sequences for mouse *Rfwd3*-targeting studies  
(related to Methods)

| Name    | Sequence                                                                                                                                                                                                                                                                                                                                                                                                                                                                                                                                                                                                                                                                                | Used for                  |
|---------|-----------------------------------------------------------------------------------------------------------------------------------------------------------------------------------------------------------------------------------------------------------------------------------------------------------------------------------------------------------------------------------------------------------------------------------------------------------------------------------------------------------------------------------------------------------------------------------------------------------------------------------------------------------------------------------------|---------------------------|
| 1589_41 | CTAAAGGACAGTTAAGTGCATCTAGACC                                                                                                                                                                                                                                                                                                                                                                                                                                                                                                                                                                                                                                                            | PCR fragment 1            |
| 1589_51 | CTTATGGTCTCTGACTCCAAGC                                                                                                                                                                                                                                                                                                                                                                                                                                                                                                                                                                                                                                                                  | PCR fragment 1            |
| 1589_42 | TAAGCATTGGTAAACCGGTGACACGTGTCATAACTTCGTATAGCATAACATTATACGAAGT<br>TATCCCAAGTGTTTGCCTGTGAGTGTAT                                                                                                                                                                                                                                                                                                                                                                                                                                                                                                                                                                                           | PCR fragment 2            |
| 1589_52 | CTAAGGCGCGCCTCAGAATAAAAAACAGAAAGGGAATGCCATTACACAGG                                                                                                                                                                                                                                                                                                                                                                                                                                                                                                                                                                                                                                      | PCR fragment 2            |
| 1589_43 | CTAAAGTACTAATGATCCACCCAAGATAGTCACC                                                                                                                                                                                                                                                                                                                                                                                                                                                                                                                                                                                                                                                      | PCR fragment 3            |
| 1589_53 | TAAGCATTGGTAAAAATAACAGTGCAAGGTTGGGTGG                                                                                                                                                                                                                                                                                                                                                                                                                                                                                                                                                                                                                                                   | PCR fragment 3            |
| 5Pi     | CTTGTGCGCTCGCTGTTTTAACTTTTATCACCGCAGCGGAACTGCGACCGAAGGATA<br>TTTTTCATTCTCCTCTTCTGCGGGGAGGCGGGCGTGGGCAGACAGGTTAGGAACT<br>TAACTTTGGTTCGCGAGCTACTAACAGGGCGAGCCTGGATACGAACCCGGGTCTGAC<br>TGAATCCCCGCGGGCTCCCGGCGACCTGTTTATTGGGGCAGCCGTCGCTCCCGCCTT<br>CTGTGTTTATCGAAACCAAGCTTAGCAAGGGTGGGGGCAGAGGTGGAGTTCACGGT<br>CTGAGGGCCGCTGACTTTTCGGGGCCATCGGACTAGCGTTTGTGTCACTTAAAGAAGG<br>GGCTCATACGAGCACGAGCCCAGGATTTGGGGAACGTGTTTTGTTTTGGA                                                                                                                                                                                                                                                          | Southern<br>hybridization |
| P3      | CCACCCAACCTTGCCTGTTATTTTTGTTTCAGACAGTTTTGCTAGGCAGCCCAGACAG<br>GCCTTGCTTTACTATCTGTTGTTGCTGTACAGGACACATTTAGTCTACTCCCTGTTGG<br>GGTCCCCCTCCCGCCTTTAAACATTTTCTCGTATAAGTCAAGACTTTATATAGTTACCT<br>TAACAAATTGTAGTGAGTATAGTCATGAGATTTATTTATAGCAGAGGTTGCCATATAAAA<br>GGAAAGATGTTTTACTTTTGATGTGACCAACGAATGTGCCTTTGGAAATTTATGCAAGCT<br>ATTGAAGCACCGATAAGCATGTCC                                                                                                                                                                                                                                                                                                                                     | Southern<br>hybridization |
| NeoP    | GACTGGGCACAACAGACAATCGGCTGCTCTGATGCCGCCGTGTTCCGGCTGTCAGCGC<br>AGGGGCGCCCGTTCTTTTTGTCAAGACCGACCTGTCCGGTGCCTGAATGAACTGCA<br>GGACGAGGCAGCGCGGCTATCGTGGCTGGCCACGACGGGCGTTCCTTGCGCAGCTGT<br>GCTCGACGTTGTCCTGAAGCGGGAAGGACTGGCTGCTATTGGGCGAAGTGCCGGG<br>GCAGGATCTCCTGTCATCTCACCTTGCTCCTGCCGAGAAAGTATCCATCATGGCTGATG<br>CAATGCGGCGGCTGCATACGCTTGATCCGGCTACCTGCCATTGACCACCAAGCGAA<br>ACATCGCATCGAGCGAGCACGTAAGGACTGGAAGCCGGTCTTGTGATCAGGATGAT<br>CTGGACGAAGAGCATCAGGGGCTCGCGCCAGCCGAACTGTTCCGCCAGGCTCAAGGCG<br>CGCATGCCCGACGGCGATGATCTCGTGCATGCCATGGCGATGCCTGCTTGCCGAATA<br>TCATGGTGGAAAATGGCCGTTTTCTGGATTCATCGACTGTGGCCGGCTGGGTGTGCG<br>GGACCGCTATCAGGACATAGCGTTGGCTACCCGTGATATTGCTGAAGAGCTTGG | Southern<br>hybridization |

|                           |                                                           |                    |
|---------------------------|-----------------------------------------------------------|--------------------|
| Prime<br>Time<br>Primer 1 | CACCTTCCTCATCTTCCATAGC                                    | RT-PCR<br>Exon 3-5 |
| Prime<br>Time<br>Primer 2 | TGAAGCCAACATTCCAGAACA                                     | RT-PCR<br>Exon 3-5 |
| Prime<br>Time<br>Probe A  | / 56-FAM / TCCCTAAAG / ZEN / AGTCTCCCCAGAAGCC / 31ABkFQ / | RT-PCR<br>Exon 3-5 |
| Prime<br>Time<br>Primer 1 | CCGCACAACAAACTTTTCCA                                      | RT-PCR<br>Exon 6-8 |
| Prime<br>Time<br>Primer 2 | GTGACTTACTGAATGAGCAAATGC                                  | RT-PCR<br>Exon 6-8 |
| Prime<br>Time<br>Probe B  | / 56-FAM / AATAAGGAC / ZEN / CTGAAGCTGGAGCCG / 31ABkFQ    | RT-PCR<br>Exon 6-8 |
